# Supplementary material for: Comprehensive Immunoprofiles of Renal Cell Carcinoma Subtypes
Source: MDPI journal article supplement (doi:10.3390/cancers12030602), 2020-03-05
Supplement: s1 [file s1]

## Supplementary Materilas

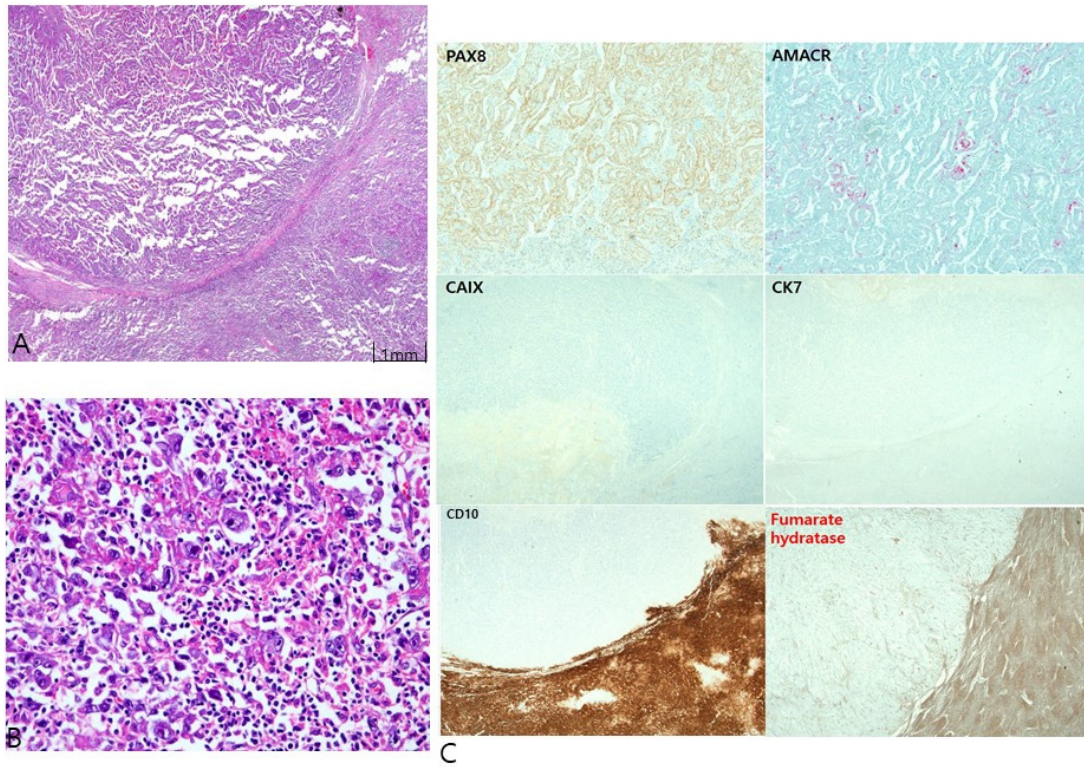

**Figure S1.** Fumarate hydratase-deficiency associated RCC. A: Multinodular mass showing papillary and solid forming growth pattern, easily categorized to papillary type II with sarcomatoid features. B: Pleomorphic tumor cells with prominent meganucleoli mimicking viral inclusion or Reed-Stenberg cell. C. Immunohistochemical panels are displayed. PAX8 is positive, but conventional markers including CK7/AMACR/CAIX/CD10 are all negative. Total loss of FH is a specific clue to FH-deficient RCC. Scale bars = 1 mm.
